# Supplementary material for: Divergent fates of antigen-specific CD8+ T cell clones in mice with acute leukemia
Source: PubMed Central journal article supplement (PMC8656370; doi:10.1016/j.celrep.2021.109991), 2021-11-09
Supplement: NIHMS1756258-supplement-1.pdf [file NIHMS1756258-supplement-1.pdf]

**Cell Reports, Volume 37**

**Supplemental information**

**Divergent fates of antigen-specific**

**CD8<sup>+</sup> T cell clones in mice with acute leukemia**

**Xiufen Chen, Brendan W. MacNabb, Blake Flood, Bruce R. Blazar, and Justin Kline**

Supplementary Figure 1

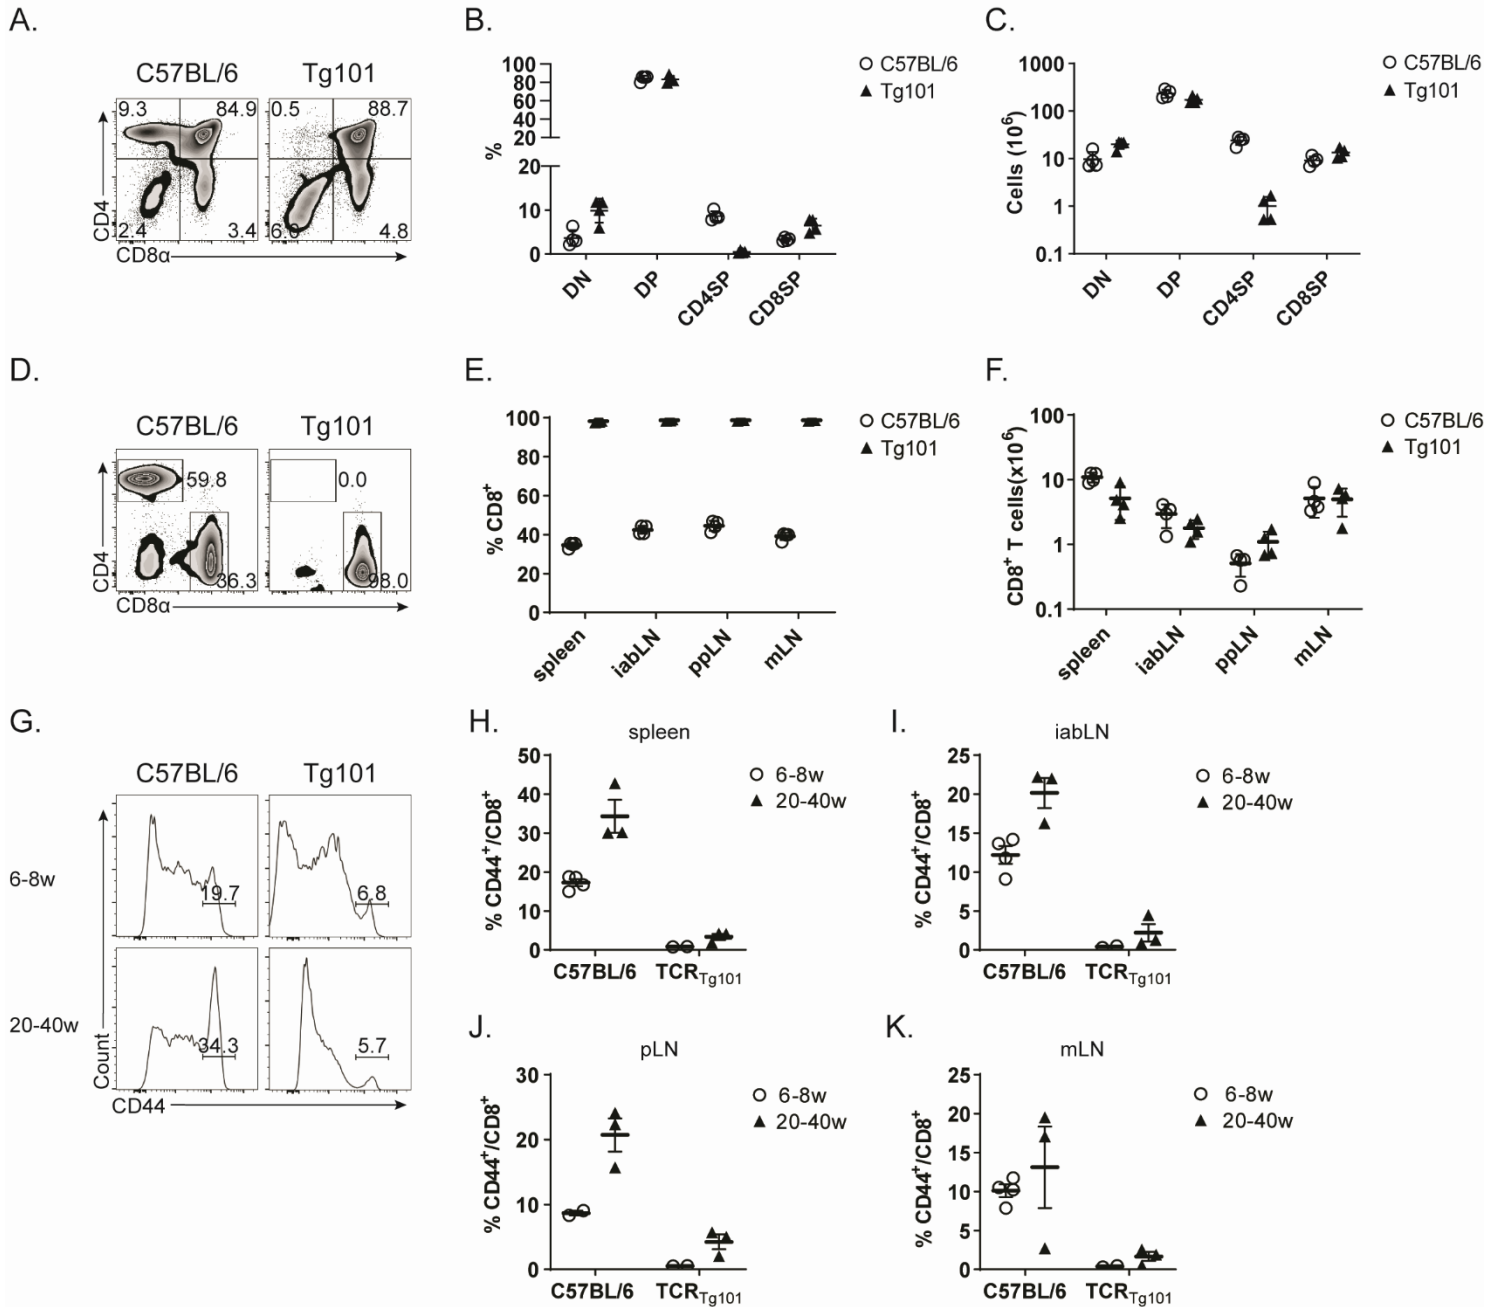

**Supplementary Figure 1. T cell phenotyping of Tg101 TCR transgenic mice. Related to Figure 1. (A-C)**

Thymocyte development in *Rag2*<sup>-/-</sup> Tg101 mice. CD4 and CD8 expression on live thymocytes from 6-8 week-old C57BL/6 and *Rag2*<sup>-/-</sup> Tg101 mice were analyzed by flow cytometry. Representative FACS plots are shown in (A). Quantified data are shown in (B and C) as mean ± SD. DN – double negative; DP – double positive; SP - single positive. (D-F) Frequencies and absolute numbers of CD4<sup>+</sup> and CD8<sup>+</sup> T cells in SLO of C57BL/6 and *Rag2*<sup>-/-</sup> Tg101 mice (gated on CD3<sup>+</sup> cells). Representative FACS plots are shown in (D) and quantified results are shown in

**(E and F)**. Sp - spleen; iabLN - pooled inguinal, axillary and brachial lymph nodes; pLN – periaortic lymph node; mLN - mesenteric lymph node. **(G-K)** Analysis of CD44 expression on CD8<sup>+</sup> T cells from C57BL/6 and *Rag2*<sup>-/-</sup> Tg101 mice. Representative FACS plots depicting the frequency of CD44-expressing splenic CD8<sup>+</sup> T cells from younger (6-8 weeks) and older (20-40 weeks) mice are shown in **(G)**. Summary plots of different SLO are shown in **(H-K)** as mean ± SD. Data are representative of at least 2 experiments with 2-4 mice/group.

## Supplementary Figure 2

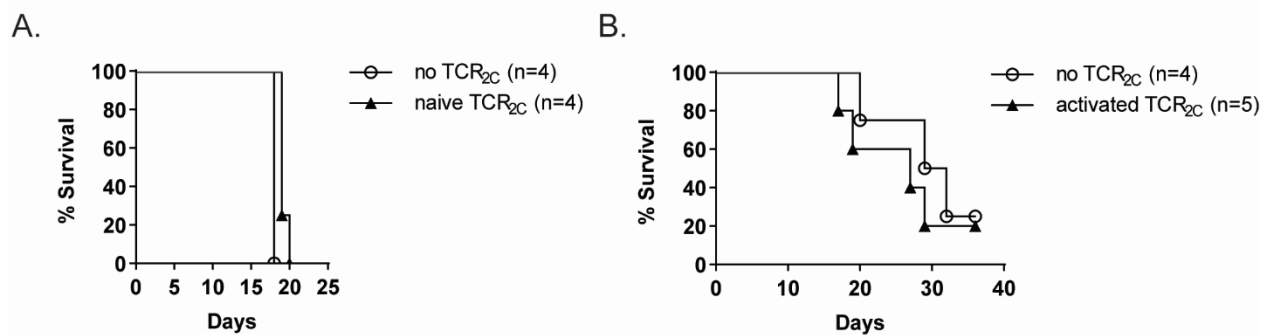

**Supplementary Figure 2. Adoptive transfer of naïve or activated TCR<sub>2C</sub> does not impact survival of mice with leukemia. Related to Figure 2. (A and B)** Survival of C57BL/6 mice challenged i.v. with C1498.SIY cells ( $10^6$ ) and transferred or not with naïve (A) or *in vitro* activated (B) TCR<sub>2C</sub> ( $4 \times 10^6$ ) 3-5 days later.

Supplementary Figure 3

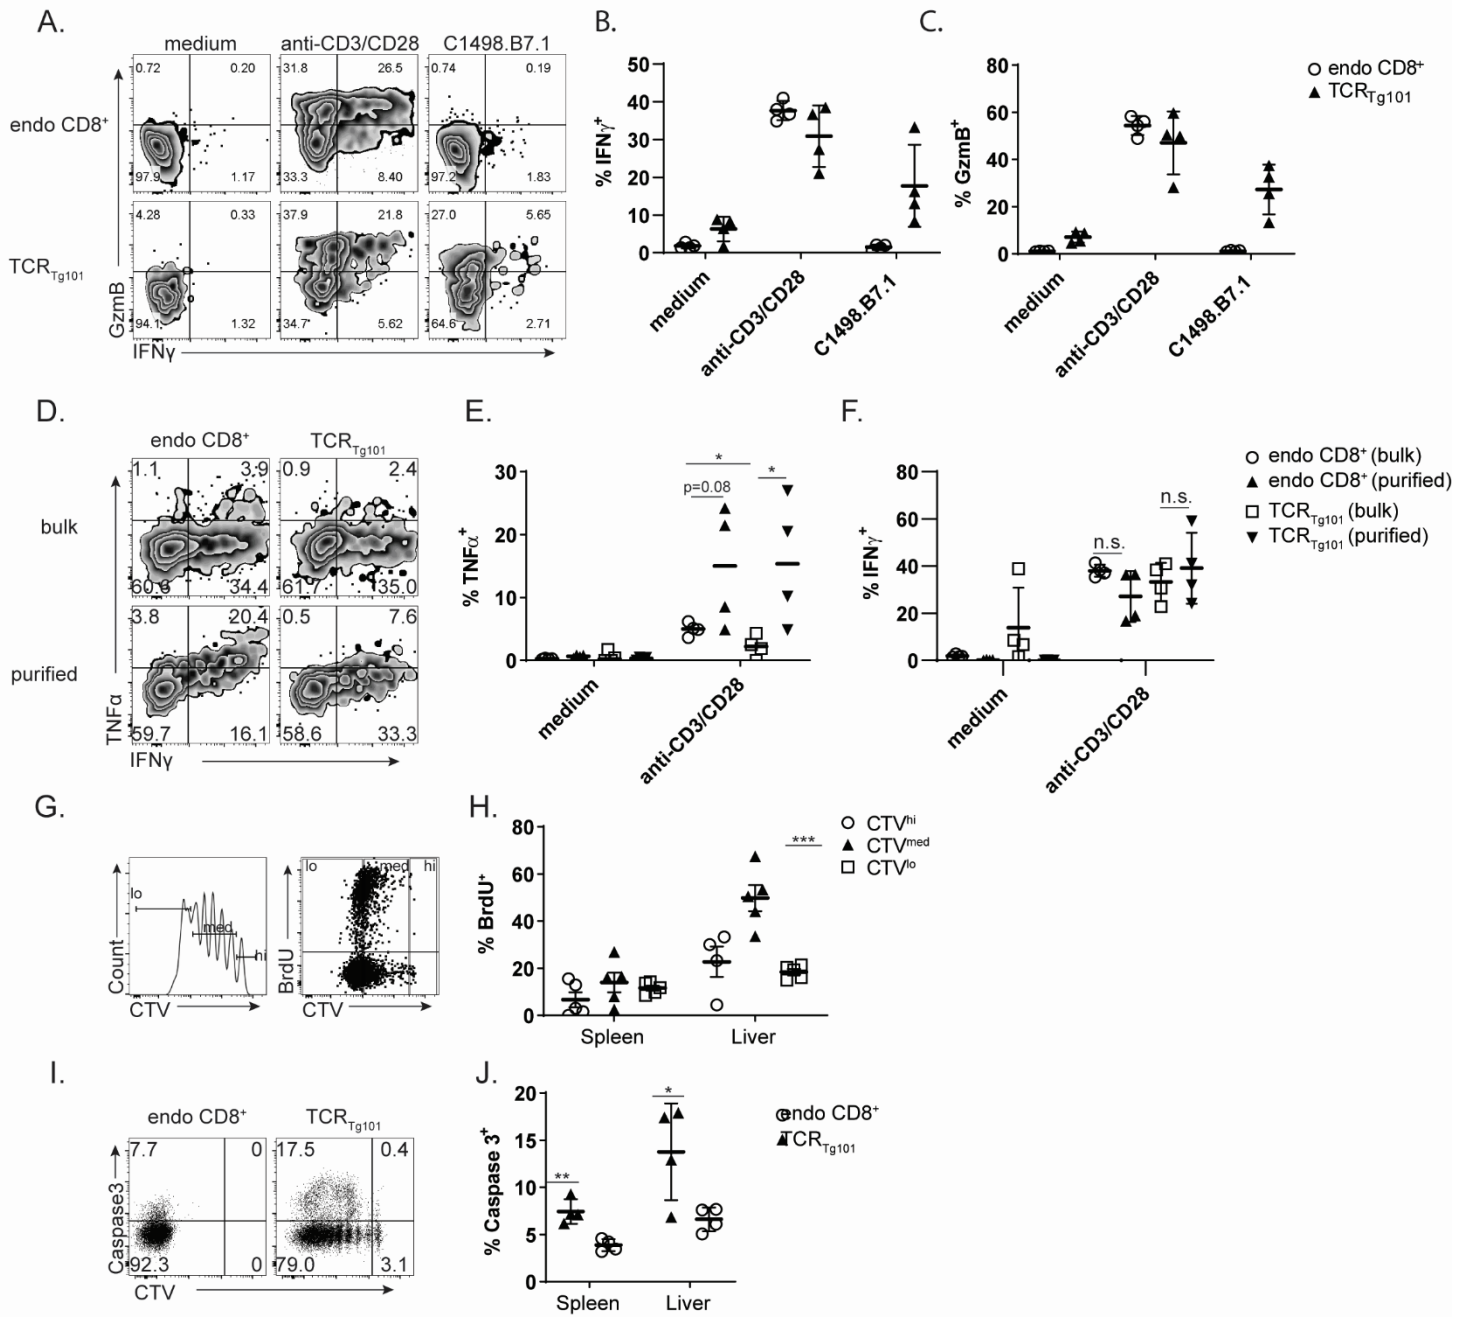

**Supplementary Figure 3. TCR<sub>Tg101</sub> effector cytokine, proliferation and apoptosis profiles. Related to Figure**

**2.** (A-C) Mononuclear cells isolated from livers of mice 18 days after C1498 cell inoculation (19 days following TCR<sub>Tg101</sub> (CD45.1.2) adoptive transfer) were restimulated with anti-CD3 and anti-CD28 antibodies or irradiated C1498.B7.1 cells with IL-2 (50 U/ml), IL-7 (5 ng/ml), and IL-12 (20 ng/ml) overnight. Cytokine production was analyzed by flow cytometry. Gating was performed on TCR $\beta$ <sup>+</sup>CD8<sup>+</sup>CD45.1 cells (endogenous CD8<sup>+</sup> T cells) or TCR $\beta$ <sup>+</sup>CD8<sup>+</sup>CD45.1.2 cells (TCR<sub>Tg101</sub>). (A) Representative FACS plots showing IFN $\gamma$  and Granzyme B (GzmB)

production by endogenous CD8<sup>+</sup> T cells or TCR<sub>Tg101</sub>. Quantitative data are shown in **(B and C)** as mean ± SD. **(D-F)** CD8<sup>+</sup> T cells (endogenous and TCR<sup>Tg101</sup>) were purified or not from Ficoll-enriched mononuclear cells from livers of mice 18 days after C1498 cell inoculation. Bulk mononuclear cells or purified CD8<sup>+</sup> T cells were restimulated with anti-CD3 and anti-CD28 antibodies plus IL-2 and IL-12 overnight, and cytokine production was analyzed by flow cytometry. Gating was performed on TCRβ<sup>+</sup>CD8<sup>+</sup>CD45.1 cells (endogenous CD8<sup>+</sup> T cells) or TCRβ<sup>+</sup>CD8<sup>+</sup>CD45.1.2 cells (TCR<sub>Tg101</sub>). **(D)** Representative FACS plots showing TNFα and IFNγ production by endogenous CD8<sup>+</sup> T cells or TCR<sub>Tg101</sub> from bulk or purified CD8<sup>+</sup> T cell populations. Quantitative data are shown in **(E and F)** as mean ± SD. \* p < 0.05; n.s. – not significant **(G and H)** BrdU incorporation by CTV-labeled TCR<sub>Tg101</sub> in livers of leukemia-bearing mice 17 days after C1498 cell challenge. **(G)** Representative FACS plots showing CTV<sup>hi</sup>, CTV<sup>med</sup>, and CTV<sup>low</sup> TCR<sub>Tg101</sub> populations (left) and BrdU incorporation by CTV dilution of TCR<sub>Tg101</sub> (right). Gating was performed on TCRβ<sup>+</sup>CD8<sup>+</sup>CD45.2 cells. **(H)** Quantified data from **(G)** as mean ± SD. **(I and J)** Activated caspase 3 in endogenous CD8<sup>+</sup> T cells or TCR<sub>Tg101</sub> from spleens or livers of leukemia-bearing mice 17 days following C1498 cell challenge. **(I)** Representative FACS plots showing activated caspase 3 expression in endogenous CD8<sup>+</sup> T cells and TCR<sub>Tg101</sub> in livers of leukemia-bearing animals. **(J)** Quantified data shown as mean ± SD. Data are pooled from 2 experiments with 2-3 mice/group. \* p < 0.05; \*\* p < 0.01. \*\*\* p < 0.001. n.s. – not significant.



Supplementary Figure 5

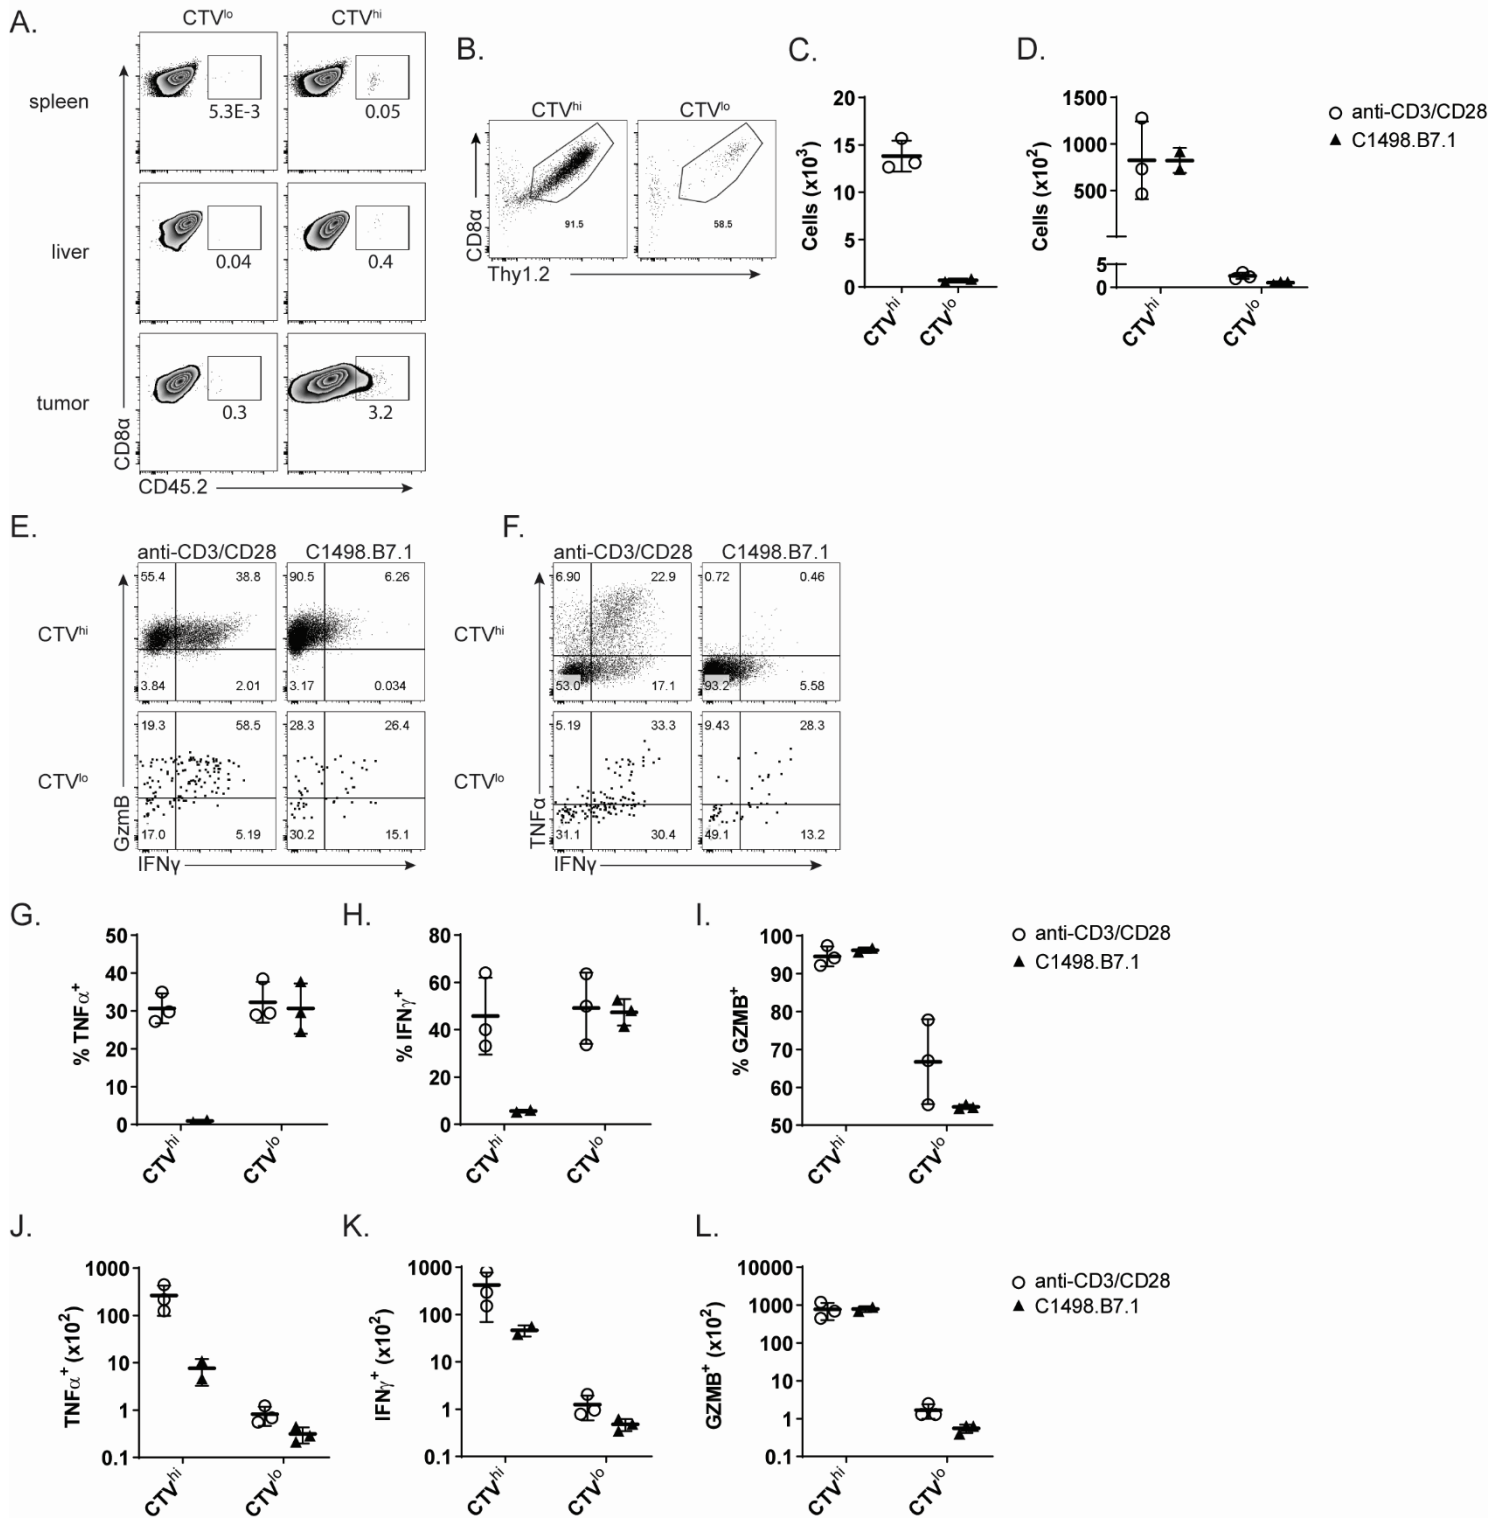

Supplementary Figure 5. The dysfunctional TCR<sub>Tg101</sub> phenotype is not readily reversible. Related to Figure

4. (A) Identification of naïve (CTV<sup>hi</sup>) or exhausted (CTV<sup>lo</sup>) TCR<sub>Tg101</sub> in secondary hosts. Experimental design outlined in Figure 4A. Representative FACS plots showing frequencies of naïve (CTV<sup>hi</sup>) and exhausted (CTV<sup>lo</sup>) TCR<sub>Tg101</sub> (CD45.1.2) in the indicated tissues of secondary B6.SJL mice (CD45.1) with s.c. C1498 tumors. (B and



**(C)** CTV<sup>hi</sup> (naïve) and CTV<sup>lo</sup> (exhausted) TCR<sub>Tg101</sub> were FACS-purified from livers of leukemia-bearing mice 17-18 days after i.v C1498 cell challenge, and ( $1 \times 10^4$ ) were cultured with of IL-2 (50 U/ml), IL-7 (5 ng/ml), IL-12 (20 ng/ml) and IL-15 (5 ng/ml) for 5 days, at which point, surviving TCR<sub>Tg101</sub> were enumerated. **(B)** Representative FACS plots showing live TCR<sub>Tg101</sub> from CTV<sup>hi</sup> and CTV<sup>lo</sup> populations. Quantified data are shown in **(C)**. **(D-L)** CTV<sup>hi</sup> and CTV<sup>lo</sup> TCR<sub>Tg101</sub> were FACS-purified from livers of leukemia-bearing mice 17-18 days after i.v C1498 cell challenge, and  $2-3 \times 10^4$  CTV<sup>hi</sup> or CTV<sup>lo</sup> TCR<sub>Tg101</sub> were restimulated with anti-CD3 and anti-CD28 antibodies or irradiated C1498.B7.1 cells in the presence of IL-2 (50 U/ml) and IL-12 (20 ng/ml) for 5 days. Viability and cytokine production by CTV<sup>hi</sup> and CTV<sup>lo</sup> TCR<sub>Tg101</sub> was analyzed by flow cytometry. **(D)** Quantification of live TCR<sub>Tg101</sub> following 5 days of *in vitro* culture. **(E and F)** Representative FACS plots showing effector cytokine production and GzmB expression among *in vitro* cultured CTV<sup>hi</sup> and CTV<sup>lo</sup> TCR<sub>Tg101</sub> following restimulation with anti-CD3 and anti-CD28 antibodies or with irradiated C1498.B7.1 cells. **(G-I)** Quantified data showing frequencies of IFN $\gamma$ -, TNF $\alpha$ -, or dual cytokine-producing, viable CTV<sup>hi</sup> and CTV<sup>lo</sup> TCR<sub>Tg101</sub> after restimulation. **(J-L)** Quantified data showing absolute numbers of IFN $\gamma$ -, TNF $\alpha$ -, or dual cytokine-producing, viable CTV<sup>hi</sup> and CTV<sup>lo</sup> TCR<sub>Tg101</sub> after restimulation. Data are representative of 2 experiments with 2-3 mice/group and shown as mean  $\pm$  SD.

# Supplementary Figure 6

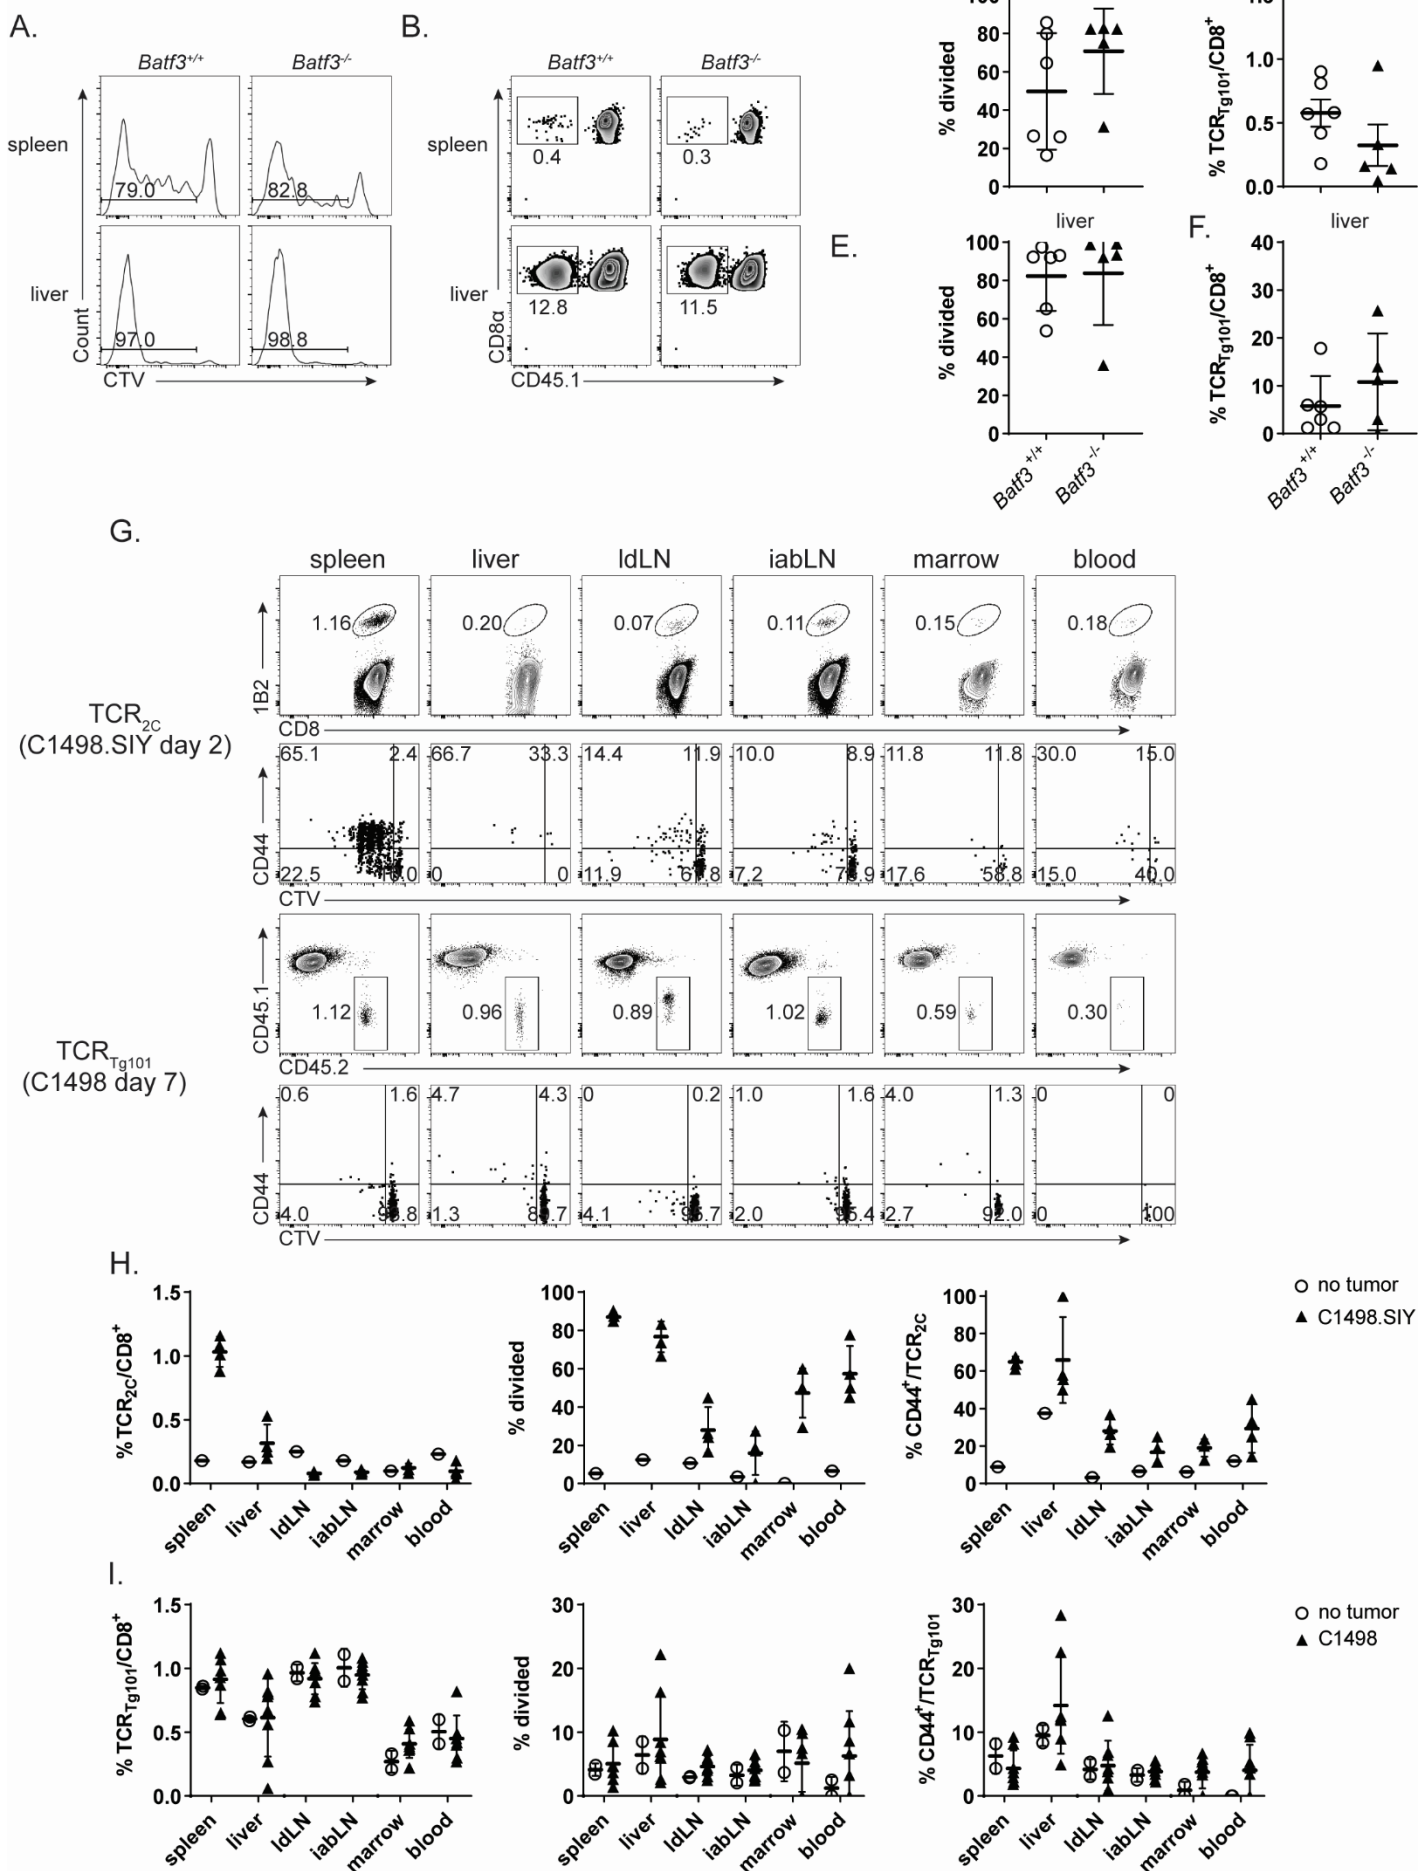

**Supplementary Figure 6. TCR<sub>Tg101</sub> initially encounter antigen in the liver in a cDC1-independent manner.**

**Related to Figures 5 and 6.** (A-F) CTV-labeled TCR<sub>Tg101</sub> (CD45.2) were adoptively transferred into *Batf3*<sup>+/+</sup> (CD45.1) or *Batf3*<sup>-/-</sup> (CD45.1.2) mice 1 day prior to i.v. challenge with C1498 cells. Fifteen days later, TCR<sub>Tg101</sub> proliferation and frequencies in spleens and livers of *Batf3*<sup>+/+</sup> and *Batf3*<sup>-/-</sup> mice were analyzed by flow cytometry. Representative FACS plots showing CTV dilution (A) or frequency (B) of TCR<sub>Tg101</sub> in spleens and livers of leukemia-bearing *Batf3*<sup>+/+</sup> and *Batf3*<sup>-/-</sup> mice. (C-F) Quantitative data showing percent divided TCR<sub>Tg101</sub> (C and E) and TCR<sub>Tg101</sub> frequencies (D and F) in spleens (C and D) and livers (E and F) of leukemia-bearing *Batf3*<sup>+/+</sup> versus *Batf3*<sup>-/-</sup> mice. Data in C-E are pooled from 2 independent experiments with 2-3 mice/group and shown as mean ± SD. (G-I) 1x10<sup>6</sup> CTV-labeled TCR<sub>2C</sub> or TCR<sub>Tg101</sub> were adoptively transferred into groups of congenic C57BL/6 mice that received an i.v. challenge with C1498.SIY cells (TCR<sub>2C</sub>) or C1498 cells (TCR<sub>Tg101</sub>) the following day, or that received no subsequent leukemia cell challenge. Two (TCR<sub>2C</sub>) or seven (TCR<sub>Tg101</sub>) days later, spleens, livers, bone marrow, pooled skin-draining lymph nodes, pooled liver-draining lymph nodes (portal and celiac), and peripheral blood were harvested. Frequencies, proliferation profiles, and CD44 expression among TCR<sub>2C</sub> or TCR<sub>Tg101</sub> at the indicated sites were analyzed by flow cytometry. (G) Representative FACS plots showing TCR<sub>2C</sub> (top) or TCR<sub>Tg101</sub> (bottom) frequency, proliferation (CTV dilution) and CD44 expression at the sites indicated. (H and I) Quantitative data from (G), including data from leukemia-free control mice. Data in H and I are pooled of 2 independent experiments with 2-4 mice/group and shown as mean ± SD.
